# Supplementary material for: Asymmetric TMO–Metal–TMO Structure for Enhanced Efficiency and Long-Term Stability of Si-Based Heterojunction Solar Cells
Source: MDPI journal article supplement (doi:10.3390/ma16165550), 2023-08-09
Supplement: s1 [file s1]

## **Supporting Information**

### **Asymmetric TMO–Metal–TMO Structure for Enhanced Efficiency and Long-term Stability of Si-Based Heterojunction Solar Cells**

**Yoon-Chae Jung <sup>1</sup>, Young-Jin Yu <sup>1</sup>, Yu-Kyung Kim <sup>1</sup>, Jin Hee Lee <sup>2</sup>, Jung  
Hwa Seo <sup>3</sup> and Jea-Young Choi <sup>4,\*</sup>**

<sup>1</sup> Department of Metallurgical Engineering, Dong-A University, Busan 49315, Republic of Korea

<sup>2</sup> Department of Chemical Engineering (BK21 Four Graduate Program), Dong-A University, Busan 49315, Republic of Korea

<sup>3</sup> Department of Physics, University of Seoul, Seoul 02504, Republic of Korea

<sup>4</sup> Department of Materials Sciences & Engineering, Dong-A University, Busan 49315, Republic of Korea

\* Correspondence: [cjy4395@dau.ac.kr](mailto:cjy4395@dau.ac.kr)

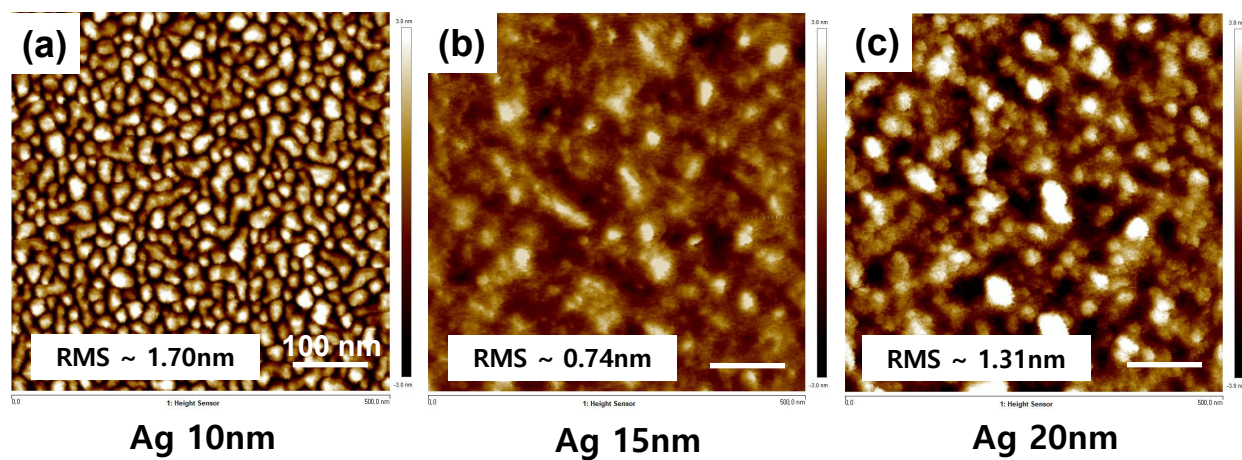

**Figure S1.** AFM images of Ag layers deposited on MO surface: (a) 10nm, (b) 15nm, and (c) 20nm.

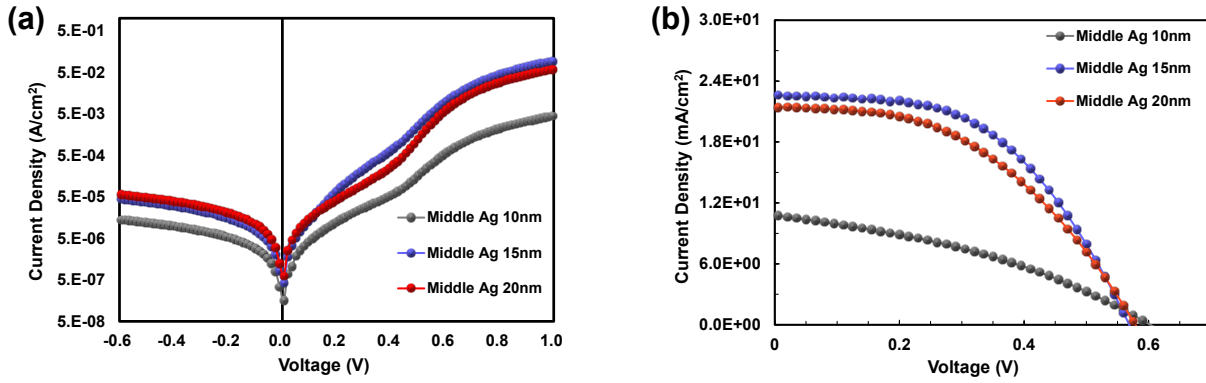

**Figure S2.** J–V curves of the TMT/Si HSCs according to the middle Ag layer thickness under (a) dark and (b) illumination (AM1.5) conditions.

**Table S1.** Solar cell characteristic parameters of the TMT/Si HSCs according to the middle Ag layer thickness under illumination (AM1.5) conditions.

| MO/Ag/VO         | $J_{sc}$<br>( $\text{mA}/\text{cm}^2$ ) | $V_{oc}$<br>(mV) | FF<br>(%) | $R_{sh}$<br>( $\Omega \cdot \text{cm}^2$ ) | $R_s$<br>( $\Omega \cdot \text{cm}^2$ ) | PCE<br>(%) |
|------------------|-----------------------------------------|------------------|-----------|--------------------------------------------|-----------------------------------------|------------|
| 8 nm/10nm/55 nm  | 10.79                                   | 603              | 36.10     | 10795                                      | 23.66                                   | 2.35       |
| 8 nm/15 nm/55 nm | 23.24                                   | 574              | 56.78     | 23207                                      | 2.91                                    | 7.57       |
| 8 nm/20 nm/55 nm | 21.44                                   | 579              | 46.04     | 21567                                      | 4.72                                    | 5.72       |
